# Supplementary material
Source: Springer Nature journal article supplement (https://www.springermedizin.de/resource/supplementary/12955_2010_702_MOESM1_ESM.pdf/9561138)

**EORTC QLQ-C30 score**

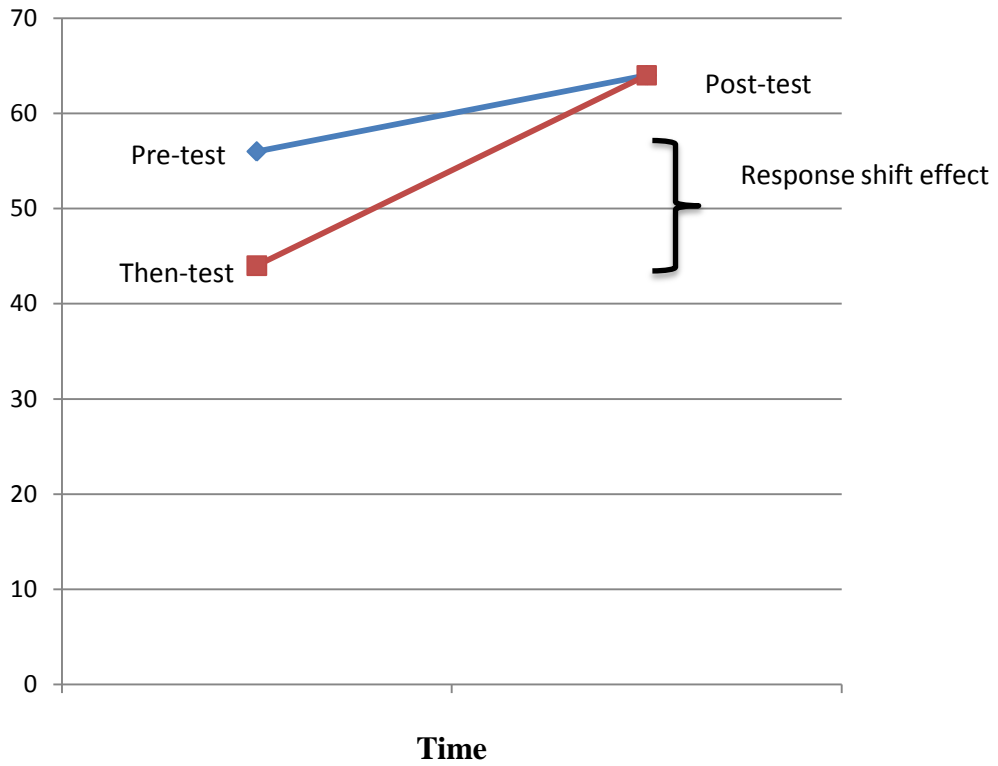

- ◆— Observed changes
- Adjusted changes

Supplement: MOESM1 [file 9561138]
